# Supplementary material for: Adaptive Urban Economies: Evidence of Temporal Behavioural Adaptation to Extreme Heat in Australian Cities
Source: Research Square preprint supplement (doi:10.21203/rs.3.rs-6949742/v1), 2025-07-17
Supplement: Supplementary file 1 [file 30a849a451390fa02a95387a.docx]

**Appendix: Merchant Category Codes**

| **Merchant Category Code (MCC)** | **MCC Description** | **Spending Category** |
| --- | --- | --- |
| 5310 | Discount Stores | Department & Variety Stores |
| 5311 | Department Stores | Department & Variety Stores |
| 5331 | Variety Stores | Department & Variety Stores |
| 5811 | Caterers | Dining |
| 5812 | Eating Places Restaurants | Dining |
| 5813 | Drinking Places | Bars & Clubs |
| 5814 | Fast Food Restaurants | Dining |
| 7032 | Sporting/Recreation Camps | Entertainment |
| 7802 | Government-Licensed Horse/Dog Racing | Entertainment |
| 7832 | Motion Picture Theaters | Entertainment |
| 7841 | Video Tape Rental Stores | Entertainment |
| 7922 | Theatrical Ticket Agencies | Entertainment |
| 7929 | Bands Orchestras | Entertainment |
| 7932 | Billiard/Pool Establishments | Entertainment |
| 7933 | Bowling Alleys | Entertainment |
| 7941 | Sports Clubs/Fields | Entertainment |
| 7992 | Golf Courses - Public | Entertainment |
| 7994 | Video Game Arcades | Entertainment |
| 7995 | Betting/Casino Gambling | Entertainment |
| 7996 | Amusement Parks/Carnivals | Entertainment |
| 7997 | Country Clubs | Entertainment |
| 7998 | Aquariums | Entertainment |
| 7999 | Miscellaneous Recreation Services | Entertainment |
| 2791 | Typesetting Plate Making and Related Services | Specialised & Luxury Goods |
| 5044 | Photographic Photocopy Microfilm Equipment and Supplies | Specialised & Luxury Goods |
| 5045 | Computers Peripherals and Software | Specialised & Luxury Goods |
| 5047 | Medical Dental Ophthalmic and Hospital Equipment and Supplies | Specialised & Luxury Goods |
| 5094 | Precious Stones and Metals Watches and Jewelry | Specialised & Luxury Goods |
| 5111 | Stationary Office Supplies Printing and Writing Paper | Specialised & Luxury Goods |
| 5122 | Drugs Drug Proprietaries and Druggist Sundries | Specialised & Luxury Goods |
| 5192 | Books Periodicals and Newspapers | Specialised & Luxury Goods |
| 5193 | Florists Supplies Nursery Stock and Flowers | Specialised & Luxury Goods |
| 5399 | Miscellaneous General Merchandise | Specialised & Luxury Goods |
| 5681 | Furriers and Fur Shops | Specialised & Luxury Goods |
| 5697 | Tailors Alterations | Specialised & Luxury Goods |
| 5698 | Wig and Toupee Stores | Specialised & Luxury Goods |
| 5732 | Electronics Stores | Specialised & Luxury Goods |
| 5733 | Music Stores-Musical Instruments Pianos and Sheet Music | Specialised & Luxury Goods |
| 5734 | Computer Software Stores | Specialised & Luxury Goods |
| 5735 | Record Stores | Specialised & Luxury Goods |
| 5815 | Digital Goods: Media Books Movies Music | Specialised & Luxury Goods |
| 5816 | Digital Goods: Games | Specialised & Luxury Goods |
| 5817 | Digital Goods: Applications (Excludes Games) | Specialised & Luxury Goods |
| 5818 | Digital Goods: Large Digital Goods Merchant | Specialised & Luxury Goods |
| 5832 | Antique Shops Sales Repairs and Restoration Services | Specialised & Luxury Goods |
| 5912 | Drug Stores and Pharmacies | Specialised & Luxury Goods |
| 5931 | Used Merchandise and Secondhand Stores | Specialised & Luxury Goods |
| 5932 | Antique Shops | Specialised & Luxury Goods |
| 5933 | Pawn Shops | Specialised & Luxury Goods |
| 5937 | Antique Reproductions | Specialised & Luxury Goods |
| 5940 | Bicycle Shops | Specialised & Luxury Goods |
| 5941 | Sporting Goods Stores | Specialised & Luxury Goods |
| 5942 | Book Stores | Specialised & Luxury Goods |
| 5943 | Stationery Stores Office and School Supply Stores | Specialised & Luxury Goods |
| 5944 | Jewelry Stores Watches Clocks and Silverware Stores | Specialised & Luxury Goods |
| 5945 | Hobby Toy and Game Shops | Specialised & Luxury Goods |
| 5946 | Camera and Photographic Supply Stores | Specialised & Luxury Goods |
| 5948 | Luggage and Leather Goods Stores | Specialised & Luxury Goods |
| 5949 | Sewing Needlework Fabric and Piece Goods Stores | Specialised & Luxury Goods |
| 5950 | Glassware Crystal Stores | Specialised & Luxury Goods |
| 5961 | Mail Order Houses Including Catalog Order Stores Book/Record Clubs (No longer permitted for U.S. original presentments) | Specialised & Luxury Goods |
| 5970 | Artist's Supply and Craft Shops | Specialised & Luxury Goods |
| 5971 | Art Dealers and Galleries | Specialised & Luxury Goods |
| 5972 | Stamp and Coin Stores | Specialised & Luxury Goods |
| 5973 | Religious Goods Stores | Specialised & Luxury Goods |
| 5975 | Hearing Aids Sales and Supplies | Specialised & Luxury Goods |
| 5976 | Orthopedic Goods - Prosthetic Devices | Specialised & Luxury Goods |
| 5977 | Cosmetic Stores | Specialised & Luxury Goods |
| 5978 | Typewriter Stores | Specialised & Luxury Goods |
| 5992 | Florists | Specialised & Luxury Goods |
| 5993 | Cigar Stores and Stands | Specialised & Luxury Goods |
| 5994 | News Dealers and Newsstands | Specialised & Luxury Goods |
| 5995 | Pet Shops Pet Food and Supplies | Specialised & Luxury Goods |
| 5996 | Swimming Pools Sales | Specialised & Luxury Goods |
| 5997 | Electric Razor Stores | Specialised & Luxury Goods |
| 5998 | Tent and Awning Shops | Specialised & Luxury Goods |
| 5999 | Miscellaneous Specialty Retail | Specialised & Luxury Goods |
| 7631 | Watch/Jewelry Repair | Specialised & Luxury Goods |
| 7829 | Picture/Video Production | Specialised & Luxury Goods |
| 5422 | Freezer and Locker Meat Provisioners | Specialised Food Retailing |
| 5441 | Candy Nut and Confectionery Stores | Specialised Food Retailing |
| 5451 | Dairy Products Stores | Specialised Food Retailing |
| 5462 | Bakeries | Specialised Food Retailing |
| 5499 | Miscellaneous Food Stores - Convenience Stores and Specialty Markets | Convenience Stores |
| 5921 | Package Stores-Beer Wine and Liquor | Package beer, Wine, & Liquor |
